# Supplementary material for: Induction of Noxa-Mediated Apoptosis by Modified Vaccinia Virus Ankara Depends on Viral Recognition by Cytosolic Helicases, Leading to IRF-3/IFN-β-Dependent Induction of Pro-Apoptotic Noxa
Source: PubMed Central journal article supplement (PMC3116819; doi:10.1371/journal.ppat.1002083), 2011-06-16

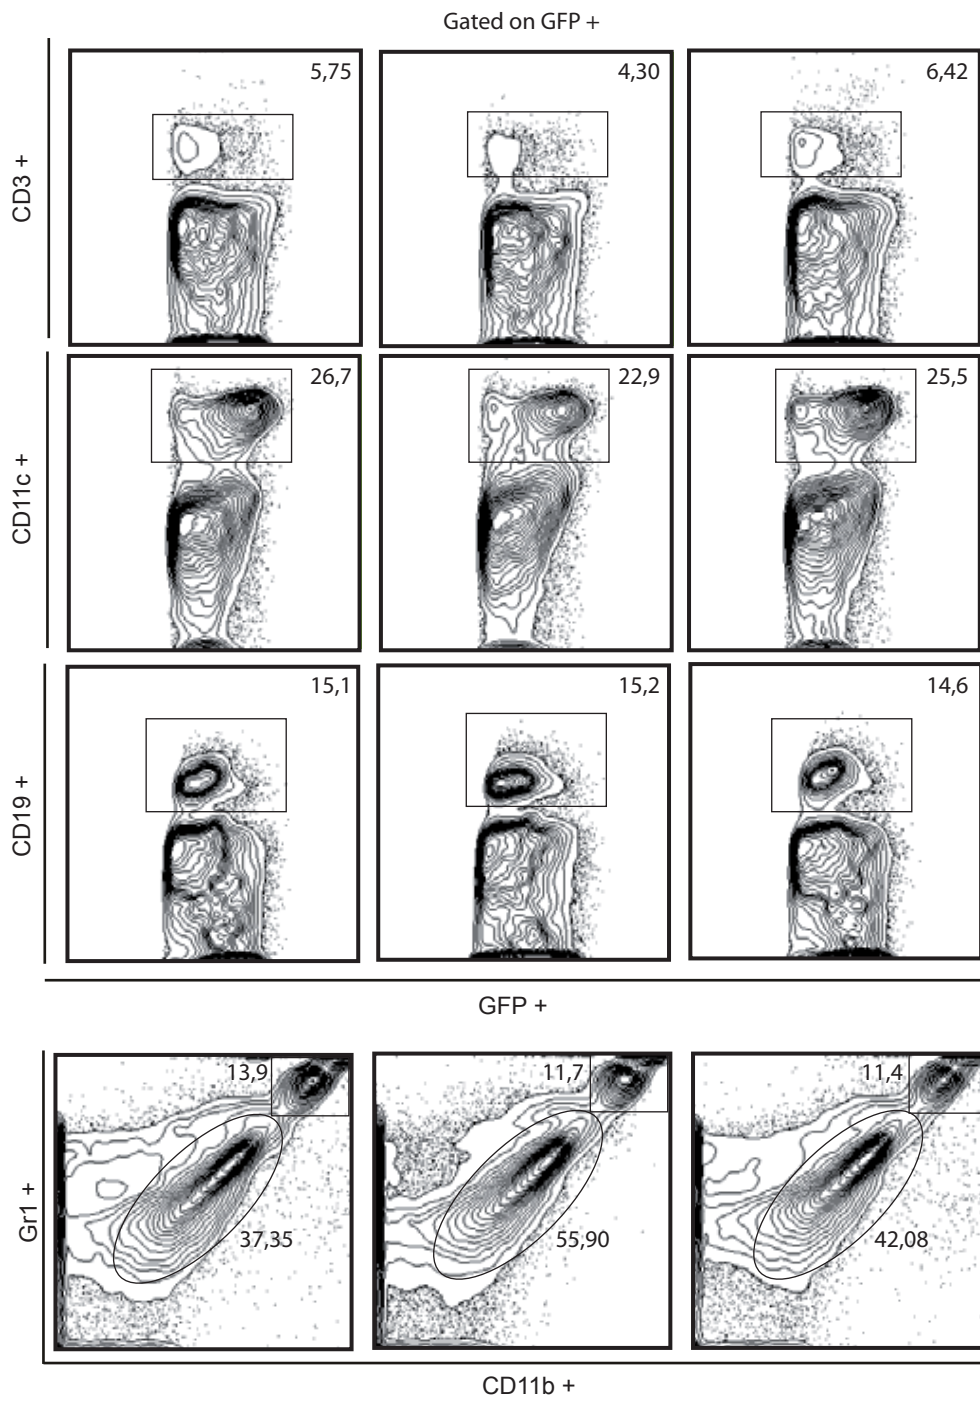

Supplement: ppat.1002083.s004.pdf [file ppat.1002083.s004.pdf]
